# Supplementary material for: Dealing with Headache: Sex Differences in the Burden of Migraine- and Tension-Type Headache
Source: MDPI journal article supplement (doi:10.3390/brainsci11101323), 2021-10-05
Supplement: s1 [file s1]

**Table S1.** Burden of headache of participants with TTH.

|                                                                                                                       | all         | females (%) | males (%)  | Chi square | P value |
|-----------------------------------------------------------------------------------------------------------------------|-------------|-------------|------------|------------|---------|
|                                                                                                                       | 161         | 96 (59.6)   | 65 (40.4)  |            |         |
| <b>Problems in love life due to headache in the past 3 months</b>                                                     |             |             |            |            |         |
| No                                                                                                                    | 116 (82.86) | 65 (78.31)  | 51 (89.47) | 2.963      | 0.085   |
| Yes                                                                                                                   | 24 (17.14)  | 18 (21.69)  | 6 (10.53)  |            |         |
|                                                                                                                       | 21 n.r.     | 13 n.r.     | 8 n.r.     |            |         |
| <b>Do you avoid telling people that you have headaches?</b>                                                           |             |             |            |            |         |
| No                                                                                                                    | 103 (72.54) | 57 (67.86)  | 46 (79.31) | 2.259      | 0.133   |
| Yes                                                                                                                   | 39 (27.46)  | 27 (32.14)  | 12 (20.69) |            |         |
|                                                                                                                       | 19 n.r.     | 12 n.r.     | 7 n.r.     |            |         |
| <b>Do you feel that your family and friends understand and accept your headaches?</b>                                 |             |             |            |            |         |
| No                                                                                                                    | 11 (7.80)   | 7 (8.43)    | 4 (6.90)   | 0.112      | 0.738   |
| Yes                                                                                                                   | 130 (92.20) | 76 (91.57)  | 54 (93.10) |            |         |
|                                                                                                                       | 20 n.r.     | 13 n.r.     | 7 n.r.     |            |         |
| <b>On that day, was there anything you could not do or did not do because you wanted to avoid getting a headache?</b> |             |             |            |            |         |
| No                                                                                                                    | 117 (86.03) | 67 (83.75)  | 50 (89.29) | 0.840      | 0.359   |
| Yes                                                                                                                   | 19 (13.97)  | 13 (16.25)  | 6 (10.71)  |            |         |
|                                                                                                                       | 25 n.r.     | 16 n.r.     | 9 n.r.     |            |         |
| <b>On that day, were you anxious or worried about your next headache episode?</b>                                     |             |             |            |            |         |
| No                                                                                                                    | 131 (94.93) | 75 (92.59)  | 56 (98.25) | 2.220      | 0.136   |
| Yes                                                                                                                   | 7 (5.07)    | 6 (7.41)    | 1 (1.75)   |            |         |
|                                                                                                                       | 23 n.r.     | 15 n.r.     | 8 n.r.     |            |         |
| <b>Headache specialist: Have you had professional advice about your headache in the last year?</b>                    |             |             |            |            |         |
| No                                                                                                                    | 34 (70.83)  | 29 (74.36)  | 5 (55.56)  | 1.251      | 0.263   |
| Yes                                                                                                                   | 14 (29.17)  | 10 (25.64)  | 4 (44.44)  |            |         |
|                                                                                                                       | 113 n.r.    | 57 n.r.     | 56 n.r.    |            |         |
| <b>Primary care doctor: Have you had professional advice about your headaches in the last year?</b>                   |             |             |            |            |         |
| No                                                                                                                    | 25 (52.08)  | 21 (53.85)  | 4 (44.44)  | 0.259      | 0.611   |
| Yes                                                                                                                   | 23 (47.92)  | 18 (46.15)  | 5 (55.56)  |            |         |
|                                                                                                                       | 113 n.r.    | 57 n.r.     | 56 n.r.    |            |         |
| <b>Has a doctor ever given you a diagnosis for this headache?</b>                                                     |             |             |            |            |         |
| No                                                                                                                    | 122 (75.78) | 70 (72.92)  | 52 (80.00) | 1.059      | 0.303   |
| Yes                                                                                                                   | 39 (24.22)  | 26 (27.08)  | 13 (20.00) |            |         |
|                                                                                                                       | 0 n.r.      | 0 n.r.      | 0 n.r.     |            |         |
| <b>Because of your headaches, have you had a MRI scan in the last year?</b>                                           |             |             |            |            |         |
| Yes                                                                                                                   | 12 (31.58)  | 9 (34.62)   | 3 (25.00)  | 0.351      | 0.553   |
| No                                                                                                                    | 26 (68.42)  | 17 (65.38)  | 9 (75.00)  |            |         |
|                                                                                                                       | 123 n.r.    | 70 n.r.     | 53 n.r.    |            |         |
| <b>Because of your headaches, have you had a CT scan in the last year?</b>                                            |             |             |            |            |         |
| Yes                                                                                                                   | 7 (35.00)   | 4 (15.38)   | 3          | 0.505      | 0.447   |
| No                                                                                                                    | 31 (65.00)  | 22 (84.62)  | 9          |            |         |

|                                                                                         |                          |                              |                            |                       |                |
|-----------------------------------------------------------------------------------------|--------------------------|------------------------------|----------------------------|-----------------------|----------------|
|                                                                                         | 123 n.r.                 | 70 n.r.                      | 53 n.r.                    |                       |                |
| <b>Because of your headaches, have you had X<br/>rays of the neck in the last year?</b> |                          |                              |                            |                       |                |
| <b>Yes</b>                                                                              | 6 (15.79)                | 4 (15.38)                    | 2 (16.67)                  |                       |                |
| <b>No</b>                                                                               | 32 (84.21)               | 22 (84.62)                   | 10 (83.33)                 | 0.10                  | 0.920          |
|                                                                                         | 123 n.r.                 | 70 n.r.                      | 53 n.r.                    |                       |                |
| <b>How bad is this headache usually?</b>                                                |                          |                              |                            |                       |                |
| <b>Not Bad</b>                                                                          | 68 (42.24)               | 36 (37.50)                   | 32 (49.23)                 |                       |                |
| <b>Bad</b>                                                                              | 80 (49.69)               | 51 (53.13)                   | 29 (44.62)                 |                       |                |
| <b>Very Bad</b>                                                                         | 13 (8.07)                | 9 (9.38)                     | 4 (6.15)                   | 2.326                 | 0.313          |
|                                                                                         | 0 n.r.                   | 0 n.r.                       | 0 n.r.                     |                       |                |
|                                                                                         | <b>all<br/>mean (SD)</b> | <b>females<br/>mean (SD)</b> | <b>males<br/>mean (SD)</b> | <b>Mann-Whitney-U</b> | <b>P value</b> |
| <b>HADS Depression</b>                                                                  | 5.75 (± 0.49)<br>38 n.r. | 5.99 (± 5.55)<br>24 n.r.     | 5.41 (± 4.98)<br>14 n.r.   | 1887.500              | 0.791          |
| <b>HADS Anxiety</b>                                                                     | 7.11 (± 4.89)<br>34 n.r. | 7.71 (± 4.81)<br>23 n.r.     | 7.30 (± 4.93)<br>11 n.r.   | 2330.500              | 0.072          |
